# Supplementary material for: Frequency and Outcomes of Reduced Dose Non–Vitamin K Antagonist Anticoagulants: Results From ORBIT‐AF II (The Outcomes Registry for Better Informed Treatment of Atrial Fibrillation II)
Source: PubMed Central journal article supplement — J Am Heart Assoc. 2018 Feb 16;7(4):e007633. doi: 10.1161/JAHA.117.007633 (PMC5850192; doi:10.1161/jaha.117.007633), 2018-02-16
Supplement: JAH3-7-e007633-s001.pdf [file JAH3-7-e007633-s001.pdf]

# Supplemental Material

## ORBIT-AF II Investigators

Sanjiv Sobti, Anthony Alfieri, James Bacon, Noel Bedwell, John Berry, Ravi Bhagwat, Stephen Bloom, Fernando Boccalandro, Leonard Parilak, James Capo, Shaival Kapadia, J. Edwin Morriss, III, Basharat Muneer, Harinder Gogia, William Herzog, David Hotchkiss, John Ip, Naseem Jaffrani, Alan Jones, John Kazmierski, Waqar Khan MPH, G. Larsen Kneller, Ajay Labroo, Brian Jaffe, Mark Lebenthal, Daniel Lee, Hodayoun Reza Ahmadian, Paul Maccaro, Nolan Mayer, Paul McLaughlin, Robert Mendelson, Benzy Padanilam, James Pooch, Joseph Raffetto, Matthew Sackett, Ricky Schneider, Jeffrey Shanes, Nasser Smiley, Calvin Snipes, Rodolfo Sotolongo, Shawn Speirs, Tahir Tak, Preet Radhawa, S. Luke Kusmirek, Preetham Jetty, Tomas Vasiliauskas, Dennis Spiller, Chakri Yarlaga, John Griffin, Richard Simons, Terrance Castor, Joseph McGarvey, Roger Guthrie, George Deriso, Craig Vogel, Sabrina Benjamin, Robert Detweiler, John Pappas, Ronald Littlefield, Paul Grena, Seth Goldberg, Kevin Browne, Steven Forman, Matthew Ebinger, David Rosenbaum, David Williams, Robert Stein, Keith Davis, Odilon Alvarado, Steven Rothman, Hicham Siouty, John Kobayashi, David Scollan, Alexander Adler, Denis Ruiz Serrano, Charles Gottlieb, Charles Gornick, Yogesh Paliwal, Raman Mitra, Shamaila A. Aslam, Larry Allen, Minang Turakhia, Mark Lurie, Albert Sun, Lawrence Rink, Mahmoud Atieh, Andrew Drabick, Eric Harman, Brent Ashcraft, Elvin Rivera-Zayas, Christopher Henes, Steven Schwartz, Hector Malave, Antony Chu, Sandip Mukherjee, Michael Underhill, Kent R. Nilsson, Michael DiGiovanna, Craig McPherson, Thomas R. Bowden, Herbert Pardell, Richard Smith, Emil Hayek, Ram Reddy, Howard Sawyer, Hyeun Park, Mir Varquez, Thomas Pow, Jeffrey Harris, Felix Sogade, C.P. Dunbar, John Dongas, Jose Birriel, Jasbir Sra, James H. French, Victor Farrah, James Cirbus, Emanuel Shaoulian, Jeffrey Whitehill, Thomas S. Backer, Bernard Grunstra, Andrew Muller, Sharan Mahal, Mark Dawson, John Earl, Afolabi O. Sangosanya, Steven Tang, Ahmad Quaddour, Abraham Salacata, Roger Estevez, Barry Troyan, Nan Jiang, Amin Karim, Kannappan Krishnaswamy, Ruben Ayala, Randeep Suneja, Anthony Inzerello, Philip Patel, Austin Kutscher, Thomas Wolf, Shaik Ali, Fernando Mera, Osvaldo Gigliotti, Mirza Baig, Kurt Lesh, Gary Korff, Hector Jimenez, Melissa Kong, Clark Soderlund, John Chin, James Allred, Roddy Canosa, Alex Foxman, Scott Wilson, Nicolas Shammas, Aylmer Tang, Edo Kaluski, J. Thomas Svinarich, John Covalsky, Rohit Sundrani, Dinesh Singal, John Norris, Ramzi Nassif, Joon Ahn, Jonathan Goldberg, Severino Pimentel, Ira Friedlander, Jason Zagrodzky, Craig Cameron, Rubina Husain, Rakesh Shah, Ofsman Quintana, Hitesh Mehta, Ian Weisberg, Vicken Vorperian, Eric Ball, Emily Morawski, Majed Chane, Salman Khan, Mehrdad K Ariani, Chad Bates, Raul Garg, Aveh Bastani, Harpreet Grewal, Kamlesh Dave, Ronald Solbrig, Chaitany Ravi, Raul Torres-Heisecke, Chafik Assal, Daniel R. Frisch, Randall Richwine, Lindsey White, Anand Irimpen, Michael D. Moran, James Kmetzo, Otis Barnum, Narendra Singh, Anna Chang, Kevin Longshaw, Jun Anthony Quion, Henri Marais, Jayson Liu, Rajesh Chawla, Mark Huth, Tyler Barrett, Raed Bargout, Allan Murphy, Naveed Razzaque, David Allen, Son Giep, Kevin Pounds, Craig R. Peterson, Amarnath Vedere, Juma Bharadia, Henry Yee, Krishnan Challappa, David Garcia, Bengt Herweg, Aga Kuliev, Steven Pearlman, Ata T. Salek, Howard Noveck, Jason Fleming, Adeeba Akhtar, Dat Tran, Amir Malik, John L. Cosby, Roberto Lopez, Rajesh Bhakta, Ned Gutman, Jimin Wang, Michael Gabris, Tak W. Kwan, Anil Gehi, Devang Desai, Valerian L. Fernandes, Valeriani Bead, Tariq Salam, Kevin Merkes, Christopher Cole, Jeffrey Banker, Joseph Sacco, Bonifasiyo Ssennyamantono, William J. French, Annette Quick, Viral Mehta, Aron Schlaue, Jay Pandhi, Jawad Zar Shaikh, Justin Weiner, Rajesh Kabra, Hector Rodriguez, Alan Tenaglia, Paul LeLorier, Lawrence Blitz, Timothy Logemann, Chris Christodoulou, John Heath, Esperanza Arce-Nunez, Hans Moore, Thor Markwood, Yamirka Duardo Guerra, Michael T. Morris, Luis Ramos, Timothy Shinn, Stephen Welka, Vijay Divakaran, M. Akram Khan, Randy Mintz, Thomas Galski, Jerald Young, Alexander Paraschos, James D. Nelson, Jerrold Grodin, David Harnick, Clayton Bredlau, Anil Chhabra, Ram Dandillaya, Raul Gazmuri, Michael Radin, Ronald D'Agostino, Chibuzo Nwokolo, Vipul Shah, Charles Henrikson, David Navratil, Mark Lieb, Subhash Banerjee, Robert D Chamberlain, Jr, Shawn Howell, Peter Rouvelas, Nikhil Kapoor,

William Eaves, Gauarv Aggarwala, Ibrahim Elgabry, Walid Saber, Rakesh Passi, Syed Ahmed, Mayer Rashtian, Ivan Mendoza,

## Table S1. Dosing Criteria

The appropriate NOAC dosing is defined as follows, according to which NOAC agent is prescribed:

- Dabigatran<sup>1</sup>
  - 150 mg twice daily is standard dose.
  - CrCl 30 to 50 mL/min: No dosage adjustment necessary unless patient receiving concomitant dronedarone, then consider reducing dabigatran to 75 mg twice daily.
  - CrCl 15 to 30 mL/min: 75 mg twice daily unless patient receiving concomitant dronedarone, then avoid concurrent use.
  - CrCl <15 mL/min or on dialysis: not recommended.
- Rivaroxaban<sup>2</sup>
  - 20 mg once daily is standard dose.
  - CrCl 15 to 50 mL/min: 15 mg once daily.
  - CrCl <15 mL/min or on dialysis: Avoid use.
- Apixaban<sup>3</sup>
  - 5 mg twice daily unless patient has any 2 of the following: Age ≥80 years, body weight ≤60 kg, or serum creatinine ≥1.5 mg/dL, then reduce dose to 2.5 mg twice daily.
  - On dialysis: 5 mg twice daily; reduce to 2.5 mg twice daily if age ≥80 years or body weight ≤60 kg.
- Edoxaban<sup>4</sup>
  - 60 mg daily is standard dose, used when  $50 < \text{CrCl} \leq 95$  mL/min
  - CrCl 15-50: 30 mg daily
  - CrCl >95 mL/min: Contraindicated
  - CrCl <15 mL/min: Contraindicated

**Table S2. List of covariates for propensity score**

**Demographics**

1. Age, years
2. Race – African American/Hispanic/White/Others
3. Gender – Male/Female
4. Level of Education – Some School/High School Graduate/College Graduate/Post Graduate
5. Payor/Insurance – Medicare or Medicaid/private/Others

**Medical History**

1. Smoking – Current/Recent or Former/Non-smoker
2. Cancer – Yes/No
3. Hypertension – Yes/No
4. Diabetes – Yes/No
5. Hyperthyroidism – Yes/No
6. Hypothyroidism – Yes/No
7. GI Bleed – Yes/No
8. Obstructive Sleep Apnea – Yes/No
9. Dialysis – Yes/No
10. Hyperlipidemia – Yes/No
11. Anemia – Yes/No
12. Cognitive Impairment/Dementia – Yes/No
13. Frailty – Yes/No
14. Liver Disease – Yes/No
15. COPD – Yes/No
16. Alcohol Abuse – Yes/No
17. Drug Abuse – Yes/No

**Cardiovascular History**

1. Family History of AF – Yes/No
2. Peripheral Vascular Disease – Yes/No
3. Sinus Node Dysfunction/Sick Sinus Syndrome – Yes/No
4. Stroke or TIA – Yes/No
5. Congestive Heart Failure (CHF) – No CHF/NYHA Class I/NYHA Class II/NYHA Class III or NYHA Class IV
6. Significant Valvular Disease – Yes/No
7. Prior Valve Replacement/Repair – Yes/No

**Coronary Artery Disease History**

1. History of Coronary Artery Disease – Yes/No
2. Prior MI – Yes/No
3. Prior CABG – Yes/No
4. Any PCI – Yes/No

**Vital Signs & AF status**

1. Height, cm
2. Weight, kg
3. Heart Rate, bpm
4. Diastolic Blood Pressure, mmHG
5. Systolic Blood Pressure, mmHG

6. Body Mass Index, kg/m<sup>2</sup> (For imputation purpose, we will impute individual components which are weight, height)
7. Most Recent 12 Lead EKG – Sinus Rhythm
8. Most Recent 12 Lead EKG – Atrial Fibrillation
9. Most Recent 12 Lead EKG – Atrial Flutter
10. Most Recent 12 Lead EKG – Paced
11. Most Recent 12 Lead EKG – Other
12. Intraventricular Conduction – RBBB/LBBB/Non-specific IVCD or Unknown-Ventricularly Paced/none
13. QRS Duration, milliseconds

**Echocardiographic Assessment (TTE or TEE)**

1. LVEF – Normal ( $\geq 50\%$ )/Mild dysfunction ( $>40\%$ ,  $<50\%$ )/Moderate dysfunction ( $\geq 30\%$ ,  $\leq 40\%$ )/Severe dysfunction ( $<30\%$ )
2. LAD Type – Normal/Mild enlargement/Moderate enlargement/Severe enlargement

**Laboratory Data**

1. Hemotocrit, % (fill in from Hemoglobin by Hemoglobin\*3 if missing)

**Atrial Fibrillation Diagnosis**

1. Type of AF – First Detected or New Onset/Paroxysmal AF/Persistent AF /Permanent AF
2. EHRA Score – No symptoms/Mild/Severe/Disabling
3. AF management strategy – Rate Control/Rhythm Control
4. Prior Cardioversions – Yes/No
5. Prior antiarrhythmic drug – Yes/No
6. Catheter Ablation of AF – Yes/No
7. AV Node or HIS Bundle Ablation – Yes/No

**Enrolling Physician Specialty**

1. PI/Site Specialty – Cardiology/Electrophysiology/Neurology or Internal Medicine

**Table S3: Standardized differences between propensity matched subjects (N=1,302)**

| <i>Variable</i>                  | <i>Appropriate-Standard<br/>N=651</i> | <i>Inappropriate-Reduced<br/>N=651</i> | <i>Standardized<br/>difference</i> | <i>P</i> |
|----------------------------------|---------------------------------------|----------------------------------------|------------------------------------|----------|
| NOAC                             |                                       |                                        | 0.0%                               | 0.9999   |
| Rivaroxaban                      | 278 (42.7)                            | 278 (42.7)                             |                                    |          |
| Apixaban                         | 373 (57.3)                            | 373 (57.3)                             |                                    |          |
| Age, years                       | 77.0 (8.8)                            | 77.4 (8.8)                             | 4.8%                               | 0.3900   |
| Race                             |                                       |                                        | 11.4%                              | 0.6515   |
| White                            | 561 (86.2)                            | 565 (86.8)                             |                                    |          |
| Black/African American           | 29 (4.5)                              | 29 (4.5)                               |                                    |          |
| Hispanic                         | 42 (6.5)                              | 39 (6.0)                               |                                    |          |
| American Indian/Alaska Native    | 2 (0.3)                               | 0 (0.0)                                |                                    |          |
| Asian                            | 9 (1.4)                               | 13 (2.0)                               |                                    |          |
| Native Hawaiian/Pacific Islander | 1 (0.2)                               | 0 (0.0)                                |                                    |          |
| Other/Not Reported               | 7 (1.1)                               | 5 (0.8)                                |                                    |          |
| Female                           | 310 (47.6)                            | 321 (49.3)                             | 3.4%                               | 0.5419   |
| Level of education               |                                       |                                        | 4.7%                               | 0.8674   |
| Some school                      | 74 (11.4)                             | 83 (12.7)                              |                                    |          |
| High school graduate             | 330 (50.7)                            | 320 (49.2)                             |                                    |          |
| College graduate                 | 179 (27.5)                            | 182 (28.0)                             |                                    |          |
| Post graduate                    | 68 (10.4)                             | 66 (10.1)                              |                                    |          |
| Insurance                        |                                       |                                        | 6.9%                               | 0.8153   |
| Private Health Insurance         | 285 (43.8)                            | 278 (42.7)                             |                                    |          |
| Medicaid                         | 24 (3.7)                              | 28 (4.3)                               |                                    |          |
| Medicare                         | 319 (49.0)                            | 321 (49.3)                             |                                    |          |
| Other                            | 15 (2.3)                              | 19 (2.9)                               |                                    |          |
| None                             | 8 (1.2)                               | 5 (0.8)                                |                                    |          |
| Smoking status                   |                                       |                                        | 7.5%                               | 0.6099   |
| Never                            | 344 (52.8)                            | 353 (54.2)                             |                                    |          |
| Current                          | 39 (6.0)                              | 32 (4.9)                               |                                    |          |
| Former                           | 268 (41.2)                            | 265 (40.7)                             |                                    |          |
| Recent                           | 0 (0.0)                               | 1 (0.2)                                |                                    |          |
| Cancer                           | 168 (25.8)                            | 173 (26.6)                             | 1.7%                               | 0.7526   |
| Hypertension                     | 562 (86.3)                            | 557 (85.6)                             | 2.2%                               | 0.6901   |
| Diabetes                         | 226 (34.7)                            | 198 (30.4)                             | 9.2%                               | 0.0977   |
| Hyperthyroidism                  | 14 (2.2)                              | 10 (1.5)                               | 4.6%                               | 0.4099   |
| Hypothyroidism                   | 125 (19.2)                            | 139 (21.4)                             | 5.4%                               | 0.3345   |
| GI bleed                         | 34 (5.2)                              | 37 (5.7)                               | 2.0%                               | 0.7142   |
| Obstructive sleep apnea          | 83 (12.7)                             | 86 (13.2)                              | 1.4%                               | 0.8046   |
| Dialysis                         | 4 (0.6)                               | 4 (0.6)                                | 0.0%                               | 0.9999   |
| Hyperlipidemia                   | 485 (74.5)                            | 464 (71.3)                             | 7.3%                               | 0.1905   |
| Anemia                           | 85 (13.1)                             | 81 (12.4)                              | 1.8%                               | 0.7396   |

| <i>Variable</i>                            | <i>Appropriate-Standard<br/>N=651</i> | <i>Inappropriate-Reduced<br/>N=651</i> | <i>Standardized<br/>difference</i> | <i>P</i> |
|--------------------------------------------|---------------------------------------|----------------------------------------|------------------------------------|----------|
| Cognitive impairment/Dementia              | 16 (2.5)                              | 19 (2.9)                               | 2.8%                               | 0.6072   |
| Frailty                                    | 32 (4.9)                              | 37 (5.7)                               | 3.4%                               | 0.5362   |
| Liver disease                              | 10 (1.5)                              | 12 (1.8)                               | 2.4%                               | 0.6672   |
| COPD                                       | 74 (11.4)                             | 82 (12.6)                              | 3.8%                               | 0.4948   |
| Alcohol abuse                              | 15 (2.3)                              | 16 (2.5)                               | 1.0%                               | 0.8558   |
| Drug abuse                                 | 6 (0.9)                               | 7 (1.1)                                | 1.5%                               | 0.7804   |
| Family history of AF                       | 50 (7.7)                              | 46 (7.1)                               | 2.4%                               | 0.6714   |
| Peripheral vascular disease                | 74 (11.4)                             | 68 (10.4)                              | 3.0%                               | 0.5937   |
| Sinus node dysfunction/Sick sinus syndrome | 76 (11.7)                             | 74 (11.4)                              | 1.0%                               | 0.8622   |
| Stroke or TIA                              | 81 (12.4)                             | 93 (14.3)                              | 5.4%                               | 0.3284   |
| CHF/ NYHA class                            |                                       |                                        |                                    |          |
| No CHF                                     | 487 (74.8)                            | 492 (75.6)                             | 6.4%                               | 0.5848   |
| NYHA Class I                               | 48 (7.4)                              | 51 (7.8)                               |                                    |          |
| NYHA Class II                              | 87 (13.4)                             | 82 (12.6)                              |                                    |          |
| NYHA Class III                             | 28 (4.3)                              | 26 (4.0)                               |                                    |          |
| NYHA Class IV                              | 1 (0.2)                               | 0 (0.0)                                |                                    |          |
| Significant valvular disease               | 110 (16.9)                            | 115 (17.7)                             | 2.0%                               | 0.7140   |
| Prior valve replacement/repair             | 21 (3.2)                              | 24 (3.7)                               | 2.5%                               | 0.6490   |
| History of coronary artery disease         | 229 (35.2)                            | 231 (35.5)                             | 0.6%                               | 0.9077   |
| Prior MI                                   | 86 (13.2)                             | 93 (14.3)                              | 3.1%                               | 0.5732   |
| Prior CABG                                 | 70 (10.8)                             | 80 (12.3)                              | 4.8%                               | 0.3854   |
| Any PCI                                    | 122 (18.7)                            | 123 (18.9)                             | 0.4%                               | 0.9435   |
| Height, cm                                 | 170 (11.1)                            | 169 (10.7)                             | 4.3%                               | 0.4362   |
| Weight, kg                                 | 87.5 (21.8)                           | 86.1 (22.2)                            | 6.1%                               | 0.2677   |
| Heart rate, bpm                            | 73.7 (16.1)                           | 73.8 (15.3)                            | 1.1%                               | 0.8461   |
| Diastolic blood pressure, mmHg             | 71.6 (10.4)                           | 71.9 (10.9)                            | 3.4%                               | 0.5419   |
| Systolic blood pressure, mmHg              | 127 (17.5)                            | 127 (17.4)                             | 0.6%                               | 0.9101   |
| BMI, kg/m <sup>2</sup>                     | 30.4 (7.0)                            | 30.1 (7.2)                             | 4.2%                               | 0.4536   |
| Most recent 12 lead EKG - Sinus rhythm     | 230 (35.3)                            | 230 (35.3)                             | 0.0%                               | 0.9999   |



| <i>Variable</i>                               | <i>Appropriate-Standard<br/>N=651</i> | <i>Inappropriate-Reduced<br/>N=651</i> | <i>Standardized<br/>difference</i> | <i>P</i> |
|-----------------------------------------------|---------------------------------------|----------------------------------------|------------------------------------|----------|
| Most recent 12 lead EKG - Atrial fibrillation | 320 (49.2)                            | 321 (49.3)                             | 0.3%                               | 0.9558   |
| Most recent 12 lead EKG - Atrial flutter      | 17 (2.6)                              | 14 (2.2)                               | 3.0%                               | 0.5855   |
| Most recent 12 lead EKG - Paced               | 70 (10.8)                             | 66 (10.1)                              | 2.0%                               | 0.7170   |
| Most recent 12 lead EKG - Other               | 57 (8.8)                              | 64 (9.8)                               | 3.7%                               | 0.5040   |
| Intraventricular conduction                   |                                       |                                        | 8.1%                               | 0.7098   |
| LBBB                                          | 33 (5.1)                              | 32 (4.9)                               |                                    |          |
| RBBB                                          | 69 (10.6)                             | 61 (9.4)                               |                                    |          |
| Non-specific IVCD                             | 17 (2.6)                              | 22 (3.4)                               |                                    |          |
| Ventricularly-paced                           | 54 (8.3)                              | 45 (6.9)                               |                                    |          |
| None                                          | 478 (73.4)                            | 491 (75.4)                             |                                    |          |
| QRS duration, milliseconds                    | 105 (28.2)                            | 104 (27.9)                             | 3.1%                               | 0.5772   |
| LVEF                                          |                                       |                                        | 0.6%                               | 0.9997   |
| Normal (≥50%)                                 | 537 (82.5)                            | 536 (82.3)                             |                                    |          |
| Mild dysfunction (41-49%)                     | 51 (7.8)                              | 51 (7.8)                               |                                    |          |
| Moderate dysfunction (30-40%)                 | 54 (8.3)                              | 55 (8.4)                               |                                    |          |
| Severe dysfunction (<30%)                     | 9 (1.4)                               | 9 (1.4)                                |                                    |          |
| LAD type                                      |                                       |                                        | 9.1%                               | 0.4424   |
| Normal                                        | 191 (29.3)                            | 211 (32.4)                             |                                    |          |
| Mild enlargement                              | 205 (31.5)                            | 196 (30.1)                             |                                    |          |
| Moderate enlargement                          | 168 (25.8)                            | 149 (22.9)                             |                                    |          |
| Severe enlargement                            | 87 (13.4)                             | 95 (14.6)                              |                                    |          |
| Hematocrit (%)                                | 39.2 (5.6)                            | 39.2 (5.4)                             | 0.5%                               | 0.9236   |
| AF type                                       |                                       |                                        | 5.1%                               | 0.8417   |
| First detected/New-onset                      | 241 (37.0)                            | 256 (39.3)                             |                                    |          |
| Paroxysmal                                    | 275 (42.2)                            | 264 (40.6)                             |                                    |          |
| Persistent                                    | 89 (13.7)                             | 84 (12.9)                              |                                    |          |
| Permanent                                     | 46 (7.1)                              | 47 (7.2)                               |                                    |          |
| EHRA score                                    |                                       |                                        | 5.2%                               | 0.8307   |
| No symptoms                                   | 226 (34.7)                            | 230 (35.3)                             |                                    |          |
| Mild                                          | 309 (47.5)                            | 316 (48.5)                             |                                    |          |
| Severe                                        | 108 (16.6)                            | 96 (14.7)                              |                                    |          |
| Disabling                                     | 8 (1.2)                               | 9 (1.4)                                |                                    |          |
| AF management strategy (%)                    | 246 (37.8)                            | 229 (35.2)                             | 5.4%                               | 0.3277   |
| Prior cardioversions (%)                      | 140 (21.5)                            | 139 (21.4)                             | 0.4%                               | 0.9462   |
| Prior antiarrhythmic drug (%)                 | 206 (31.6)                            | 194 (29.8)                             | 4.0%                               | 0.4710   |
| Catheter ablation of AF (%)                   | 19 (2.9)                              | 15 (2.3)                               | 3.9%                               | 0.4870   |
| AV node or HIS bundle ablation (%)            | 4 (0.6)                               | 3 (0.5)                                | 2.1%                               | 0.7047   |
| PI/Site specialty                             |                                       |                                        | 11.8%                              | 0.2104   |
| Internal medicine/Primary care                | 60 (9.2)                              | 43 (6.6)                               |                                    |          |
| Cardiology                                    | 494 (75.9)                            | 498 (76.5)                             |                                    |          |

| <i>Variable</i>   | <i>Appropriate-Standard<br/>N=651</i> | <i>Inappropriate-Reduced<br/>N=651</i> | <i>Standardized<br/>difference</i> | <i>P</i> |
|-------------------|---------------------------------------|----------------------------------------|------------------------------------|----------|
| Electrophysiology | 97 (14.9)                             | 109 (16.7)                             |                                    |          |
| Neurology         | 0 (0.0)                               | 1 (0.2)                                |                                    |          |

Figure S1. Distribution and appropriateness of dosing re-categorizing patients with borderline CrCl as appropriate for reduced dosing.

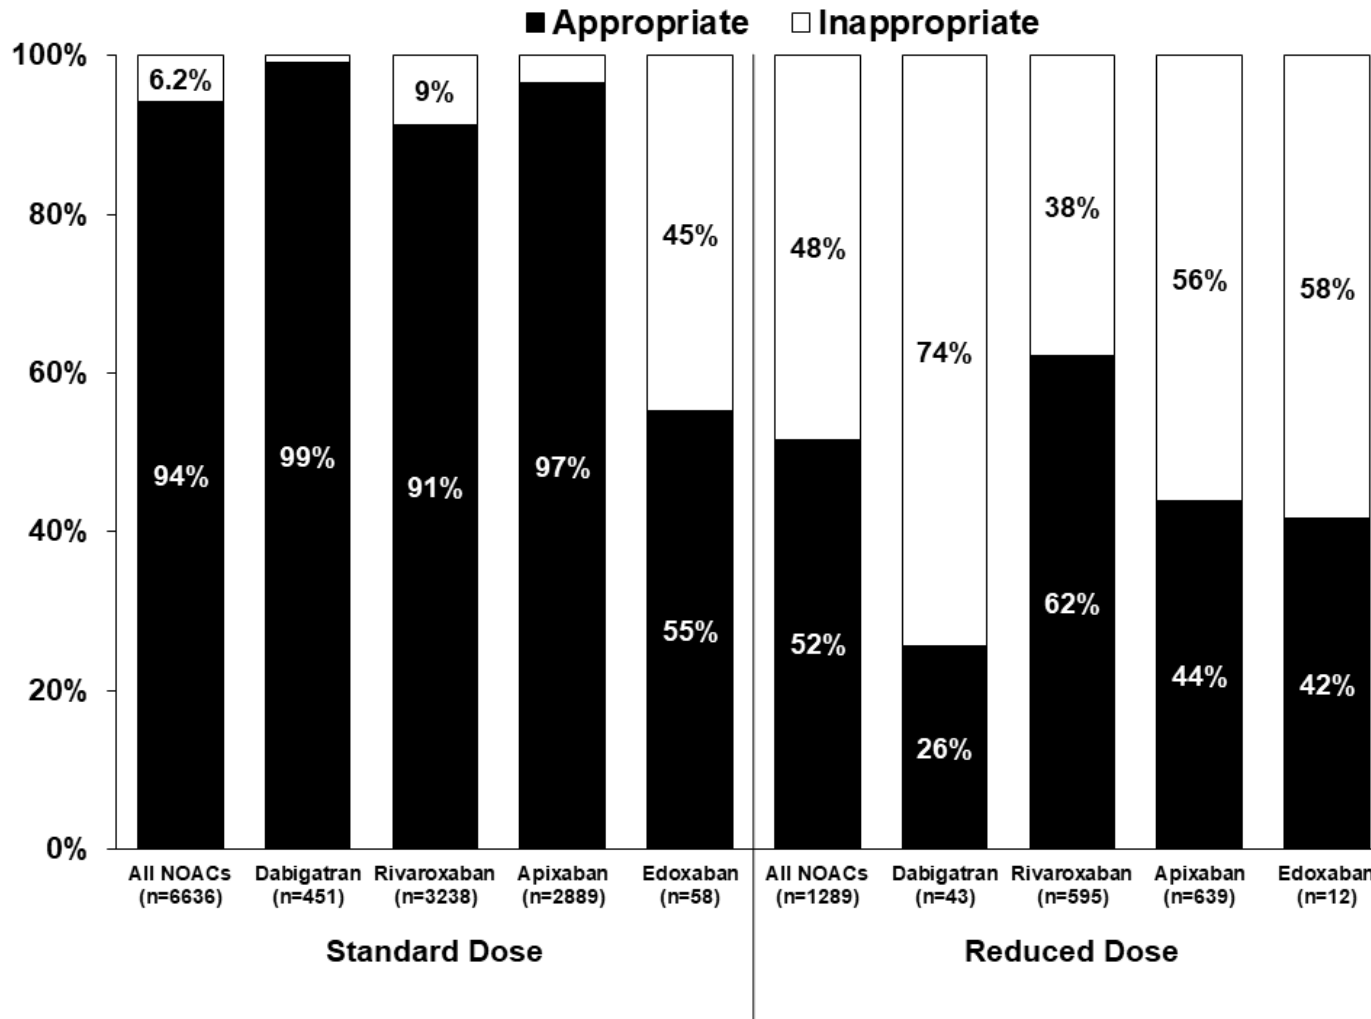

**Table S4. Event rates by NOAC dose received (rivaroxaban or apixaban), among patients *recommended* for standard NOAC dosing (n=6,584), and in propensity-matched, adjusted cohort (n=651).**

|                                     | Overall (n=6,584)<br># Events (Rate per<br>100 patient-year) | Appropriate<br>Standard<br>(n=5895) | Unadjusted (n=6,584)                |                                         |          | Propensity Matched* (n=651)             |          |
|-------------------------------------|--------------------------------------------------------------|-------------------------------------|-------------------------------------|-----------------------------------------|----------|-----------------------------------------|----------|
|                                     |                                                              |                                     | Inappropriately-<br>Reduced (n=689) | <i>HR</i> <sup>†</sup> (95% <i>CI</i> ) | <i>P</i> | <i>HR</i> <sup>†</sup> (95% <i>CI</i> ) | <i>P</i> |
| <b>Thromboembolic Outcomes</b>      |                                                              |                                     |                                     |                                         |          |                                         |          |
| Stroke, non-CNS embolism,<br>or TIA | 107 (1.43)                                                   | 91 (1.35)                           | 16 (2.11)                           | 1.56 (0.92-2.67)                        | 0.10     | 0.85 (0.41-1.78)                        | 0.7      |
| MI                                  | 47 (0.62)                                                    | 41 (0.60)                           | 6 (0.78)                            | 1.29 (0.62-2.69)                        | 0.5      | 3.17 (0.65-15.38)                       | 0.2      |
| Death                               | 229 (3.03)                                                   | 177 (2.60)                          | 52 (6.77)                           | 2.61 (1.86-3.67)                        | <.0001   | 1.36 (0.89-2.06)                        | 0.2      |
| MACNE                               | 217 (2.91)                                                   | 181 (2.70)                          | 36 (4.78)                           | 1.77 (1.28-2.46)                        | 0.0006   | 1.24 (0.76-2.02)                        | 0.4      |
| <b>Bleeding Outcomes</b>            |                                                              |                                     |                                     |                                         |          |                                         |          |
| Major bleeding                      | 221 (2.98)                                                   | 189 (2.84)                          | 32 (4.28)                           | 1.49 (1.02-2.18)                        | 0.04     | 1.16 (0.73-1.84)                        | 0.5      |
| Bleeding hospitalization            | 186 (2.50)                                                   | 159 (2.38)                          | 27 (3.60)                           | 1.49 (0.98-2.27)                        | 0.06     | 1.13 (0.64-1.99)                        | 0.7      |

†HR for inappropriately reduced dose subjects relative to appropriately standard dose subjects.

\*Matched analysis is limited to 651 appropriately standard dosed subjects and 651 inappropriately reduce dosed subjects.

NOAC: non-vitamin K antagonist oral anticoagulant; CI: confidence interval; TIA: transient ischemic attack; MI: myocardial infarction; MACNE: major adverse cardiovascular and neurological events, including a composite of TIA, stroke, non-CNS embolism, MI, or cardiovascular death.

## References

1. Boehringer-Ingelheim. Dabigatran Prescribing Information. In; 2010.
2. Pharmaceuticals J. Rivaroxaban Prescribing Information. In; 2011.
3. Squibb B-M. Apixaban Prescribing Information. In; 2012.
4. Daiichi Sankyo I. Edoxaban Prescribing Information. In; 2015.
